# Supplementary material for: An ionic liquid as a green solvent for high potency synthesis of 2D covalent organic frameworks
Source: Royal Society of Chemistry journal article supplement (doi:10.1039/d0nj01478h), 2020-01-01
Supplement: d0nj01478h1.pdf [file d0nj01478h1.pdf]

Supporting Information

Ionic liquid as a green solvent for high potency synthesis of 2D covalent organic frameworks

Limin Zhao<sup>1\*</sup>, Huimin Liu<sup>1</sup>, Yue Du<sup>1</sup>, Xiang Liang<sup>1</sup>, Wenju Wang<sup>2</sup>, Hui Zhao<sup>1</sup>, Wenzhi Li<sup>1</sup>

1. College of Materials Science and Engineering, Liaocheng University, Liaocheng 252059,

PR China

2. School of Energy and Power Engineering, Nanjing University of Science and Technology,

Nanjing 210094, China

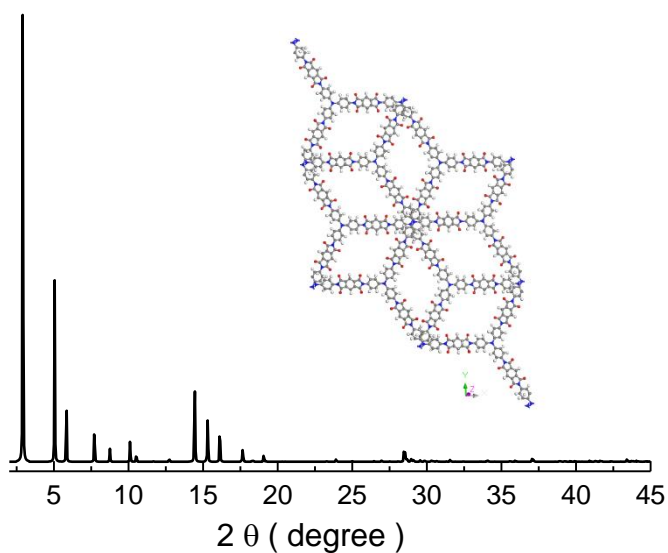

Fig. S1 Calculated PXRD pattern of PI-COF-1 based on the space group of  $P6_3/mmc$

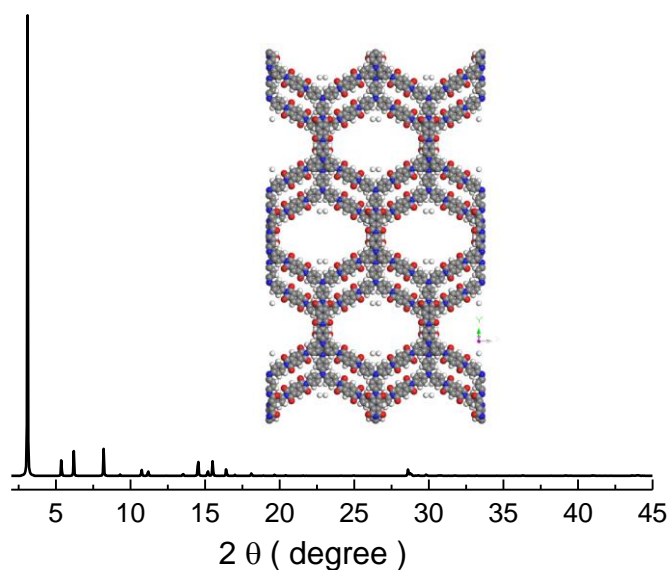

Fig. S2 Calculated PXRD pattern of PI-COF-1 based on the space group of Cmc<sub>2</sub>m

Table S1 Unit cell parameters and fractional atomic coordinates for PI-COF-1 calculated based on the space group of P6/mmm

| Space group          | P6/mmm                                                                                                        |         |         |
|----------------------|---------------------------------------------------------------------------------------------------------------|---------|---------|
| Calculated unit cell | $a = b = 32.9283 \text{ \AA}$ , $c = 3.4305 \text{ \AA}$ , $\alpha = \beta = 90^\circ$ , $\gamma = 120^\circ$ |         |         |
| atom                 | x                                                                                                             | y       | z       |
| C1                   | 0.36094                                                                                                       | 0.63906 | 0.50000 |
| C2                   | 0.41416                                                                                                       | 0.58584 | 0.50000 |
| C3                   | 0.41118                                                                                                       | 0.65863 | 0.50000 |
| C4                   | 0.43632                                                                                                       | 0.63435 | 0.50000 |
| C5                   | 0.42126                                                                                                       | 0.51178 | 0.50000 |
| C6                   | 0.45736                                                                                                       | 0.49876 | 0.50000 |
| C7                   | 0.45531                                                                                                       | 0.45531 | 0.50000 |
| O1                   | 0.37965                                                                                                       | 0.48294 | 0.50000 |
| N1                   | 0.43997                                                                                                       | 0.56003 | 0.50000 |
| N2                   | 0.33333                                                                                                       | 0.66667 | 0.50000 |
| H1                   | 0.34478                                                                                                       | 0.52599 | 0.50000 |
| H2                   | 0.30817                                                                                                       | 0.56182 | 0.50000 |
| H3                   | 0.57754                                                                                                       | 0.57754 | 0.50000 |

Table S2 Unit cell parameters and fractional atomic coordinates for PI-COF-1 calculated based on the space group of P6<sub>3</sub>/mmc.

| Space group          | P6 <sub>3</sub> /mmc                                     |         |      |
|----------------------|----------------------------------------------------------|---------|------|
| Calculated unit cell | a = b = 34.9980 Å, c = 6.2645 Å, α = β = 90 °, γ = 120 ° |         |      |
| atom                 | x                                                        | y       | z    |
| C1                   | 0.38855                                                  | 0.69428 | 0.25 |
| C2                   | 0.4949                                                   | 0.74745 | 0.25 |
| C3                   | 0.83858                                                  | 0.91929 | 0.25 |
| C4                   | 0.94482                                                  | 0.97241 | 0.25 |
| C5                   | 0.41923                                                  | 0.6747  | 0.25 |
| C6                   | 0.46863                                                  | 0.69898 | 0.25 |
| C7                   | 0.57625                                                  | 0.8213  | 0.25 |
| C8                   | 0.62517                                                  | 0.83347 | 0.25 |
| C9                   | 0.66678                                                  | 0.78983 | 0.25 |
| C10                  | 0.70839                                                  | 0.83331 | 0.25 |
| C11                  | 0.7573                                                   | 0.84546 | 0.25 |
| C12                  | 0.86481                                                  | 0.89708 | 0.25 |
| C13                  | 0.91418                                                  | 0.92221 | 0.25 |
| O1                   | 0.56388                                                  | 0.85044 | 0.25 |
| O2                   | 0.76968                                                  | 0.81633 | 0.25 |
| N1                   | 0.54646                                                  | 0.77323 | 0.25 |
| N2                   | 0.78707                                                  | 0.89354 | 0.25 |
| N3                   | 0.33333                                                  | 0.66667 | 0.25 |
| N4                   | 1                                                        | 1       | 0.75 |
| H1                   | 0.41302                                                  | 0.64149 | 0.25 |
| H2                   | 0.48558                                                  | 0.67823 | 0.25 |
| H3                   | 0.66679                                                  | 0.75699 | 0.25 |
| H4                   | 0.84791                                                  | 0.85938 | 0.25 |
| H5                   | 0.92035                                                  | 0.89519 | 0.25 |

Table S3 Unit cell parameters and fractional atomic coordinates for PI-COF-1 calculated based on the space group of Cmc<sub>m</sub>

| Space group          | Cmc <sub>m</sub>                                             |          |      |
|----------------------|--------------------------------------------------------------|----------|------|
| Calculated unit cell | a = 32.9466 Å, b = 57.0651 Å, c = 6.2388 Å, α = β = γ = 90 ° |          |      |
| atom                 | x                                                            | y        | z    |
| C1                   | -0.54142                                                     | -0.23619 | 0.75 |
| C2                   | -0.62118                                                     | -0.2096  | 0.75 |
| C3                   | -0.87894                                                     | -0.12368 | 0.75 |
| C4                   | -0.95861                                                     | -0.09712 | 0.75 |
| C5                   | -0.54696                                                     | -0.21106 | 0.75 |
| C6                   | -0.58381                                                     | -0.1985  | 0.75 |
| C7                   | -0.69878                                                     | -0.20585 | 0.75 |

|     |          |          |      |
|-----|----------|----------|------|
| C8  | -0.72932 | -0.18747 | 0.75 |
| C9  | -0.7283  | -0.14485 | 0.75 |
| C10 | -0.77085 | -0.14578 | 0.75 |
| C11 | -0.80138 | -0.12741 | 0.75 |
| C12 | -0.88094 | -0.09946 | 0.75 |
| C13 | -0.91819 | -0.08734 | 0.75 |
| C14 | -0.53491 | -0.29294 | 0.75 |
| C15 | -0.53533 | -0.31764 | 0.75 |
| C16 | -0.46683 | -0.37145 | 0.75 |
| C17 | -0.47912 | -0.39591 | 0.75 |
| C18 | -0.54356 | -0.41672 | 0.75 |
| C19 | -0.52089 | -0.43752 | 0.75 |
| C20 | -0.53318 | -0.46197 | 0.75 |
| C21 | -0.53533 | -0.51573 | 0.75 |
| C22 | -0.53488 | -0.54041 | 0.75 |
| C23 | -0.41812 | -0.24597 | 0.75 |
| C24 | -0.38086 | -0.23383 | 0.75 |
| C25 | -0.3344  | -0.17267 | 0.75 |
| C26 | -0.29156 | -0.16659 | 0.75 |
| C27 | -0.22813 | -0.18841 | 0.75 |
| C28 | -0.20826 | -0.16667 | 0.75 |
| C29 | -0.16544 | -0.16059 | 0.75 |
| C30 | -0.08373 | -0.13479 | 0.75 |
| C31 | -0.04693 | -0.12222 | 0.75 |
| C32 | -0.5     | -0.2776  | 0.75 |
| C33 | -0.5     | -0.33078 | 0.75 |
| C34 | -0.5     | -0.50262 | 0.75 |
| C35 | -0.5     | -0.55573 | 0.75 |
| O1  | -0.70716 | -0.22661 | 0.75 |
| O2  | -0.793   | -0.10665 | 0.75 |
| O3  | -0.4315  | -0.36526 | 0.75 |
| O4  | -0.56851 | -0.46817 | 0.75 |
| O5  | -0.36134 | -0.1581  | 0.75 |
| O6  | -0.13848 | -0.17516 | 0.75 |
| N1  | -0.65984 | -0.19671 | 0.75 |
| N2  | -0.8403  | -0.13656 | 0.75 |
| N3  | -0.5     | -0.35655 | 0.75 |
| N4  | -0.5     | -0.47686 | 0.75 |
| N5  | -0.5     | -0.24999 | 0.75 |
| N6  | 0        | 0.08332  | 1.25 |
| H1  | -0.52726 | -0.19756 | 0.75 |
| H2  | -0.5819  | -0.17965 | 0.75 |
| H3  | -0.71189 | -0.12843 | 0.75 |

|     |          |          |      |
|-----|----------|----------|------|
| H4  | -0.85364 | -0.08906 | 0.75 |
| H5  | -0.90777 | -0.07075 | 0.75 |
| H6  | -0.56502 | -0.28984 | 0.75 |
| H7  | -0.56456 | -0.32612 | 0.75 |
| H8  | -0.57641 | -0.41672 | 0.75 |
| H9  | -0.56458 | -0.50728 | 0.75 |
| H10 | -0.06498 | -0.0435  | 0.75 |
| H11 | -0.40772 | -0.26258 | 0.75 |
| H12 | -0.35353 | -0.24421 | 0.75 |
| H13 | -0.21171 | -0.20483 | 0.75 |
| H14 | -0.08178 | -0.15364 | 0.75 |
| H15 | -0.52724 | 0.36427  | 0.75 |

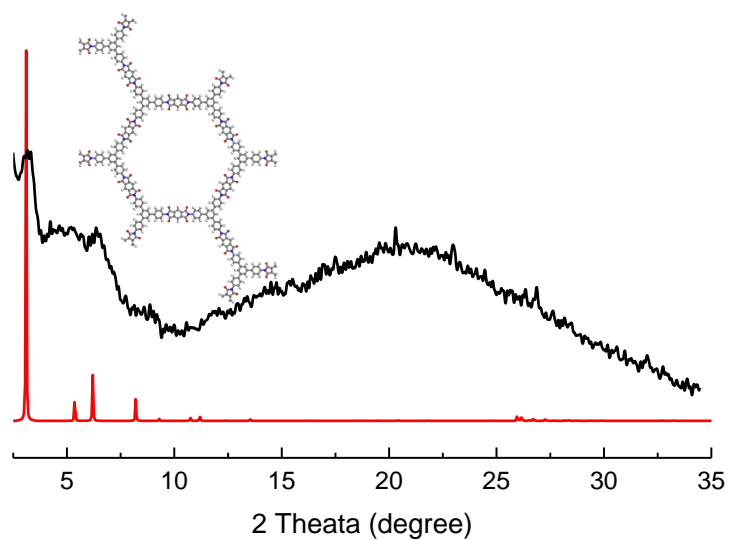

Fig. S3 Calculated and experimental PXR D pattern of PMDA-TAPB

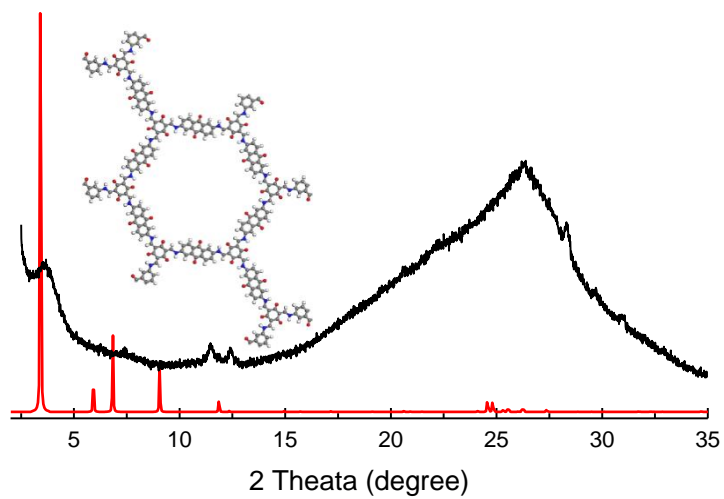

Fig. S4 Calculated and experimental PXR D pattern of TFP-DAAQ

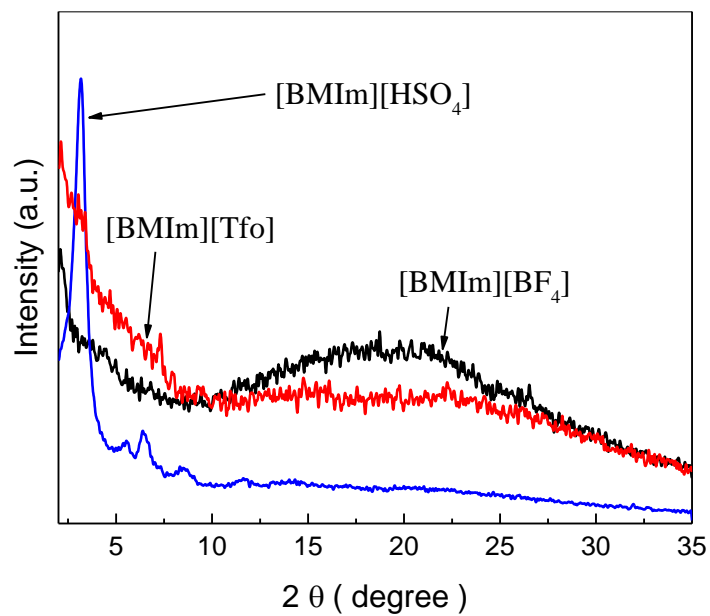

Fig. S5 PXR D pattern of PMDA-TAPA prepared with different ILs

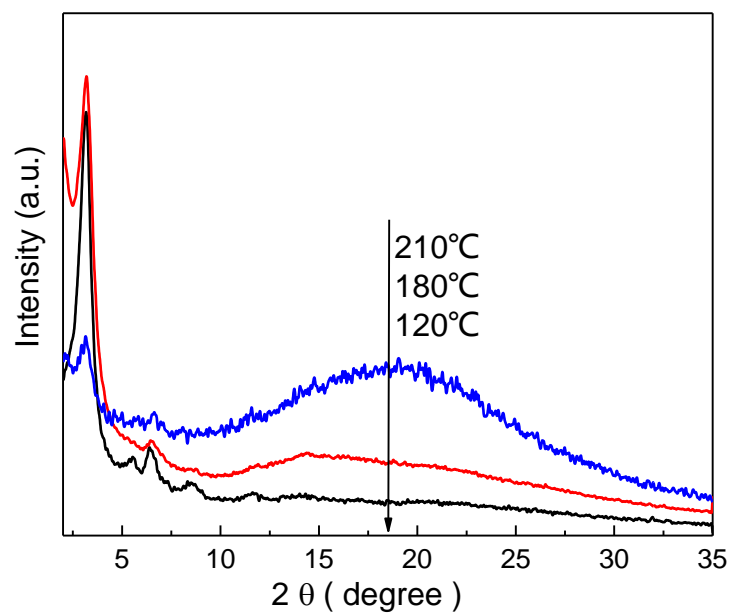

Fig. S6 PXR D pattern of PMDA-TAPA prepared with different temperature

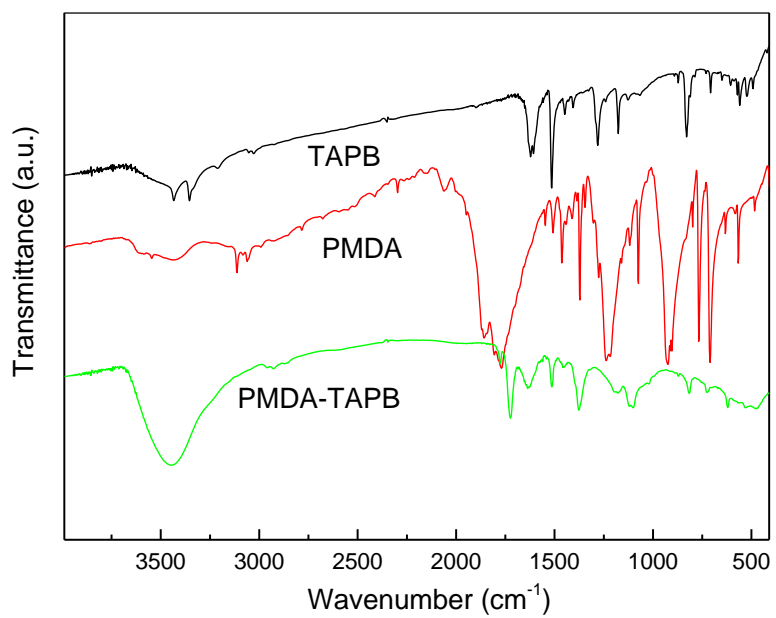

Fig. S7 FT-IR of TAPB, PDMA and PMDA-TAPB

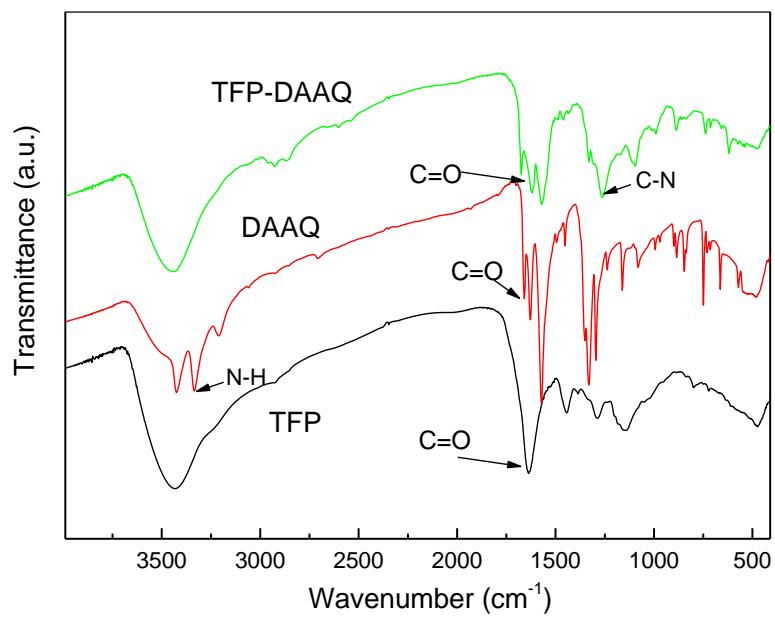

Fig. S8 FT-IR of TFP, DAAQ and TFP-DAAQ

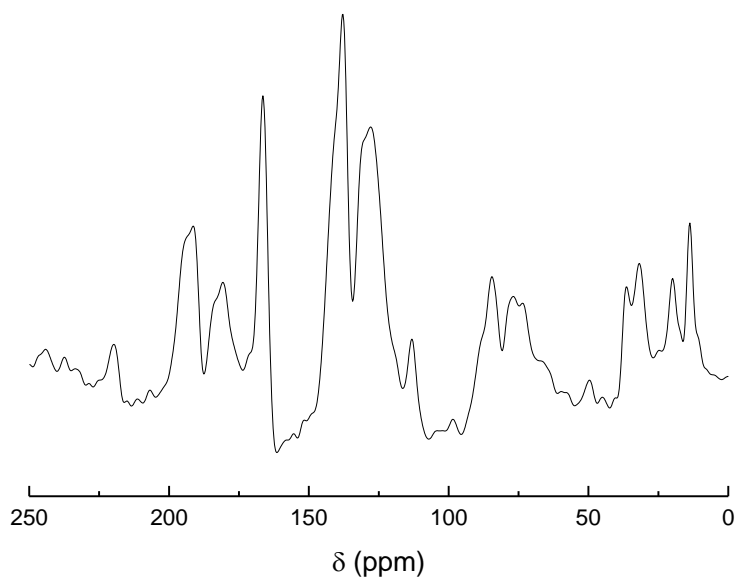

Fig. S9 The  $^{13}\text{C}$  NMR spectra of PMDA-TAPA



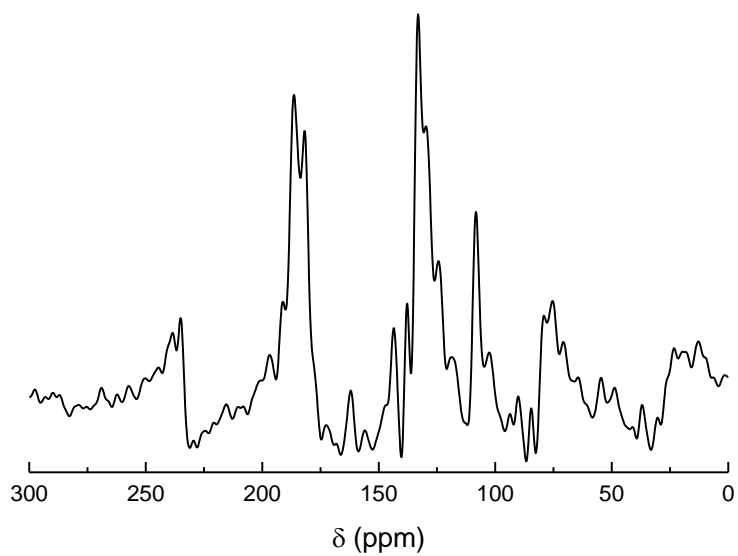

Fig. S10 The  $^{13}\text{C}$  NMR spectra of TFP-DAAQ

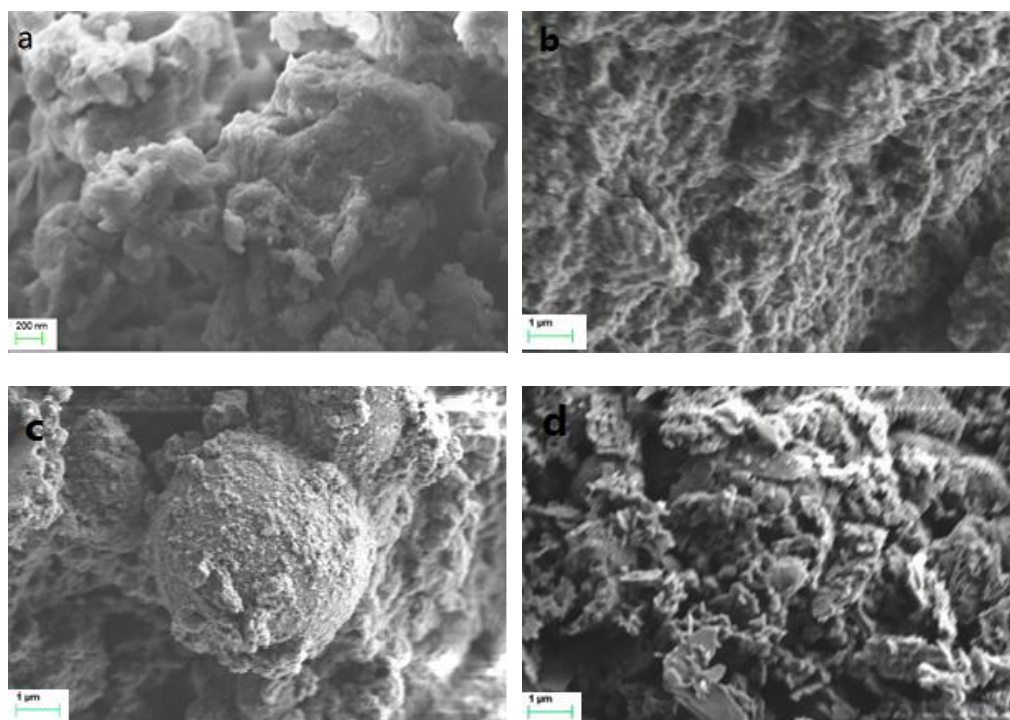

Fig. S11 SEM image of COFs (a. PMDA-TAPA, b. PMDA-TAPB, c. TFP-EB, d. TFP-DAAQ)

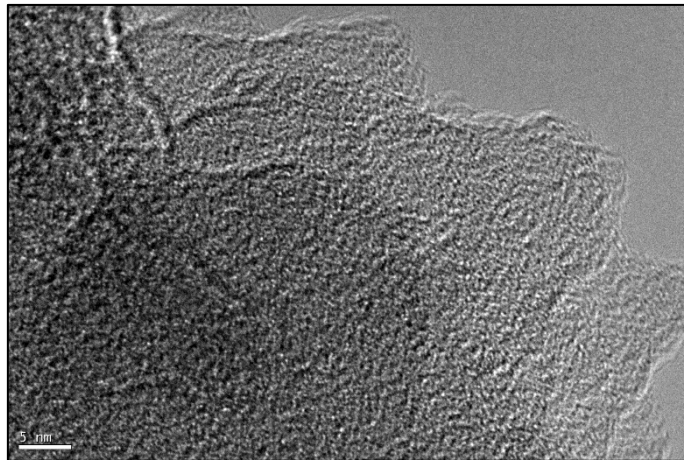

Fig. S12 TEM image of PMDA-TAPA

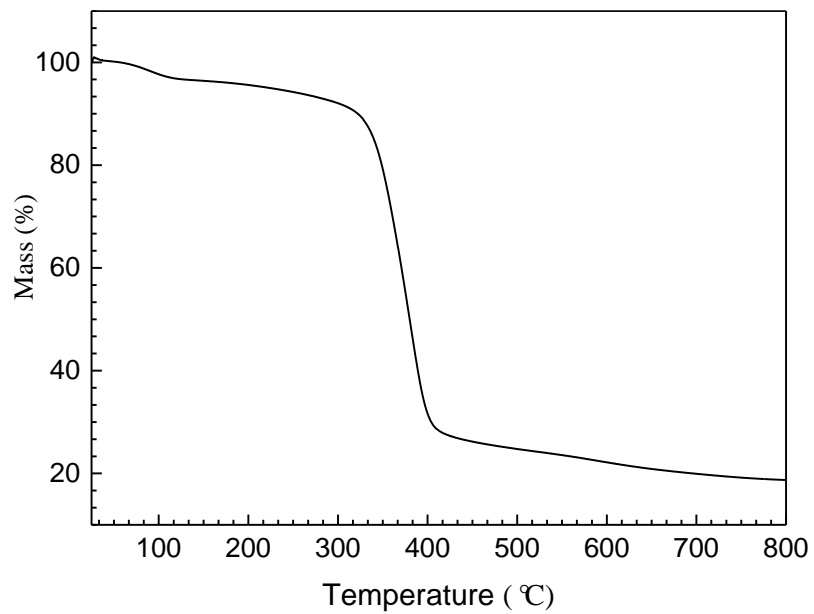

Fig. S13 TGA profile of PMDA-TAPB

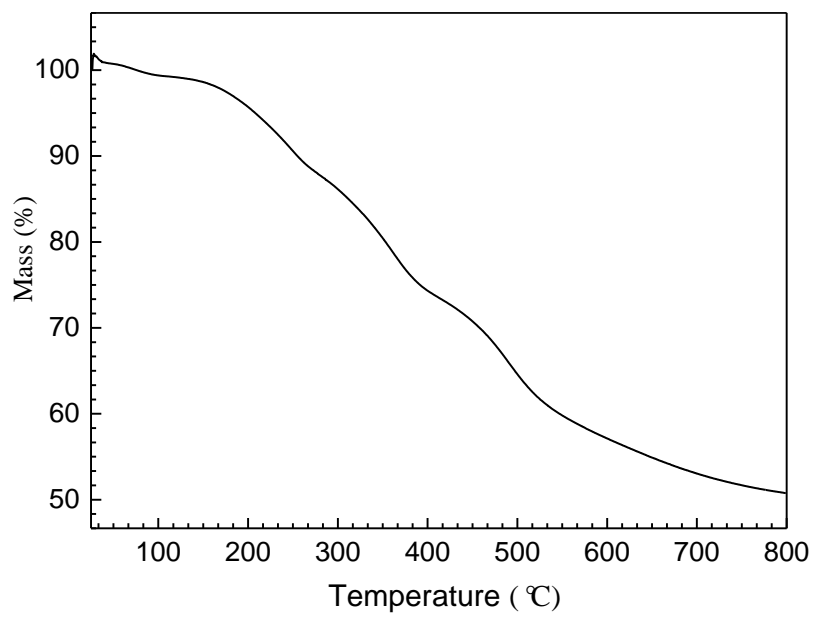

Fig. 14 TGA profile of TFP-DAAQ
